# Supplementary material
Source: Research Square preprint supplement (doi:10.21203/rs.3.rs-9524907/v1)
Supplement: Supplementary file 2 [file a6c0302335171a1b3eb6e68f.pdf]

## **Post-interview patient survey (English)**

### **1. Introduction**

Dear Patient,

What do you think about a technology that automatically converts your conversation with the pharmacist into text? Completing the questionnaire will take only a few minutes. We truly appreciate your help!

### **2. Demographic information (context)**

**Q1. Age:**

**Q2. Gender:**

- Female
- Male
- I prefer not to answer

**Q3. Your postcode:**

### **3. Experience with speech recognition during the conversation**

**Q4. Have you ever used technology that converts your voice into text?**

- Yes
- No

**Q5. Did the microphone and automatic speech recognition make you feel uncomfortable?**

- Not at all
- A little
- Neutral / no difference
- Quite a bit
- Very much

**Q6. Did you feel that the conversation remained spontaneous when speech recognition was used?**

- Not at all
- A little
- Neutral / no difference
- Quite a bit
- Very much

**Q7. Do you think this approach would be useful for other patients?**

- Definitely not
- Probably not
- Neutral / don't know
- Probably yes
- Definitely yes

**Q8. (*Optional*) What did you like and dislike about this approach?**
